# Supplementary material
Source: publisher site journal article supplement (https://www.dovepress.com/article/572357)
Supplement: Supplementary file 1 [file 572357_Supplementary%20Materials%20%2525282%252529.pdf]

## Supplementary Figure S1. Hospital questionnaire for the nationwide survey.

1. In which city is your hospital located?
2. What is the nature of your hospital?
  - A. Public tertiary hospital
  - B. Private specialized ophthalmic hospital
3. Does your hospital conduct 24-hour intraocular pressure (IOP) monitoring?
  - A. Yes
  - B. No
4. Is the measurement performed by a fixed person?
  - A. Yes
  - B. No
5. Who is responsible for performing 24-hour IOP measurement in your hospital?
  - A. On-duty doctor (a fixed person)
  - B. On-duty nurses (2-3 persons)
  - C. Relief staff/students (a fixed person)
  - D. Others
6. In which year did your hospital start conducting 24-hour IOP monitoring?
  - A.  $\leq 5$  years
  - B. 6-10 years
  - C. 11-15 years
  - D. 16-20 years
  - E.  $> 20$  years
7. How much does your hospital charge for 24-hour IOP monitoring? (Including all fees such as IOP measurement fees and hospitalization fees)
  - A.  $\leq$  USD 28 ( $\leq$  200 RMB)
  - B. USD 28-70 (201-500 RMB)
  - C. USD 70-139 (501-1000 RMB)
  - D. USD 139-279 (1001-2000 RMB)
  - E.  $>$  USD 279 ( $>$  2000 RMB)
8. Approximately how many patients does your hospital conduct 24-hour IOP monitoring on each month?
  - A. 1-10 persons
  - B. 11-20 persons
  - C. 21-30 persons

D. 31-40 persons

E. 41-50 persons

F. > 50 persons

9. On which days of the week does your hospital conduct 24-hour IOP monitoring? (Fill in the blanks)

10. How are the time points and frequencies of IOP measurement selected? (Acceptable time points  $\pm 30$ min)

A. Traditional 6-time measurement (5:00, 7:00, 10:00, 14:00, 18:00, 22:00)

B. Traditional 7-time measurement (2:00, 5:00, 7:00, 10:00, 14:00, 18:00, 22:00)

C. 12-time measurement (7:30, 9:30, 11:30, 13:30, 15:30, 17:30, 19:30, 21:30, 23:30, 1:30, 3:30, 5:30)

D. Others (Please fill in the specific time and total number of times)

11. During the 24-hour IOP measurement process, how do you measure daytime IOP?

A. Non-Contact Tonometer, sitting position

B. iCare Rebound Tonometer, sitting position

C. Tono-Pen/AccuPen, sitting position

D. Goldmann Applanation Tonometer, sitting position

12. During the 24-hour IOP measurement process, how do you measure nighttime IOP?

A. Non-Contact Tonometer, sitting position

B. iCare Rebound Tonometer, sitting position

C. Tono-Pen/AccuPen, sitting position

D. Goldmann Applanation Tonometer, sitting position

E. Non-Contact Tonometer, lying position

F. iCare Rebound Tonometer, lying position

G. Tono-Pen/AccuPen, lying position

H. Goldmann Applanation Tonometer, lying position

I. Do not measure nighttime IOP

13. Do you simultaneously measure 24-hour blood pressure while measuring 24-hour IOP?

A. Yes

B. No

14. What is the demand for 24-hour IOP monitoring at your hospital?

A. Very high

B. High

C. Moderate

D. Low

E. None

15. Do you think that conducting 24-hour IOP monitoring is helpful for the clinical diagnosis and treatment of glaucoma?

- A. Very great help
- B. Considerable help
- C. Some help
- D. No benefit

## **Supplementary Figure S2. Patient questionnaire for the single-center survey.**

1. Have you ever heard of 24-hour IOP monitoring before?
  - A. Yes
  - B. No
2. Where did you learn about 24-hour IOP monitoring?
  - A. From doctors
  - B. From family and friends
  - C. By searching online on your own
  - D. From fellow patients
3. Do you think it is necessary to conduct 24-hour IOP monitoring?
  - A. Completely necessary
  - B. Somewhat necessary
  - C. Not at all necessary
  - D. Completely unnecessary
4. Can you understand why you need 24-hour IOP monitoring?
  - A. Completely understand
  - B. Generally understand
  - C. Somewhat confused
5. To what extent are you willing to accept 24-hour IOP monitoring?
  - A. Completely willing
  - B. Generally willing
  - C. Somewhat unwilling
  - D. Completely unwilling
6. What is the main reason for your unwillingness to accept it? (Multiple responses allowed)
  - A. Hospitalization inconvenience
  - B. Perceived inaccuracy
  - C. sleep disruption
  - D. Increased cost
7. Do you know that IOP fluctuates throughout the day?
  - A. Yes
  - B. No
8. Do you know that IOP fluctuations may affect the development of glaucoma?
  - A. Yes
  - B. No
